# Supplementary material for: IVT-SAPAS: Low-Input and Rapid Method for Sequencing Alternative Polyadenylation Sites
Source: PubMed Central journal article supplement (PMC4692544; doi:10.1371/journal.pone.0145477), 2015-12-28

**UCSC**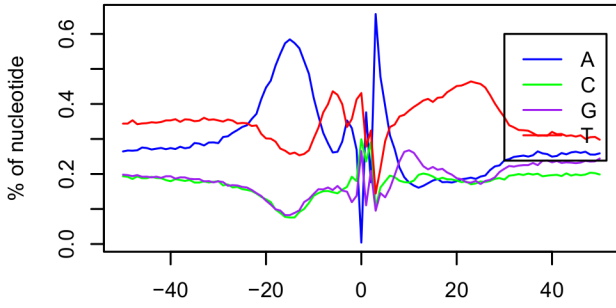**Tian\_poly(A)\_DB**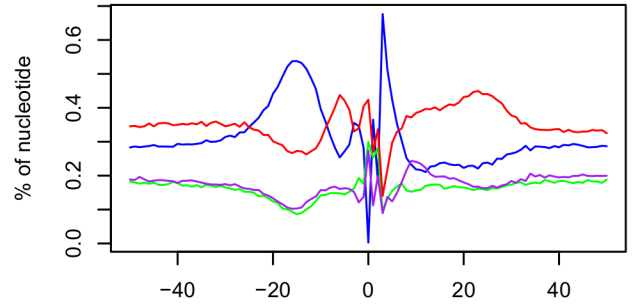**Noncoding\_gene**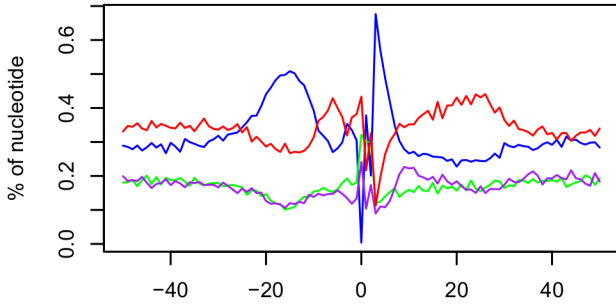**Intron**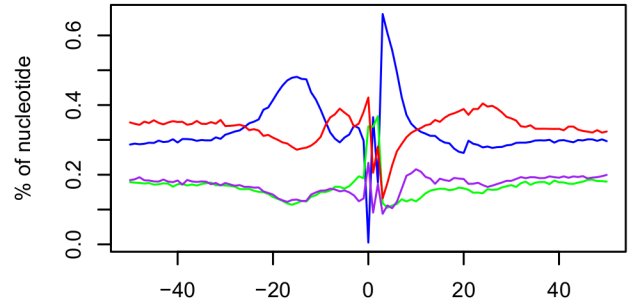**Intergenic**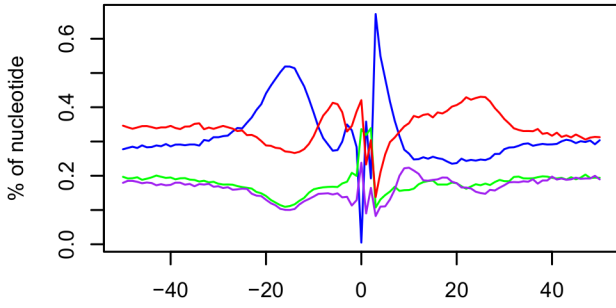**CDS**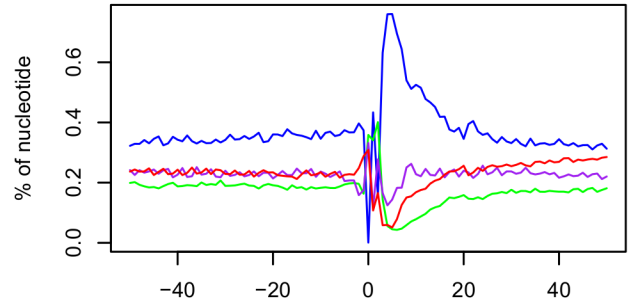**3'UTR**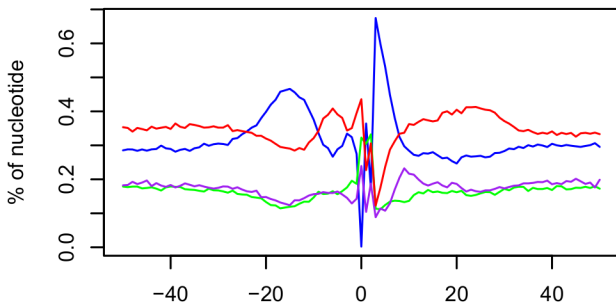**1kb\_dwonstream**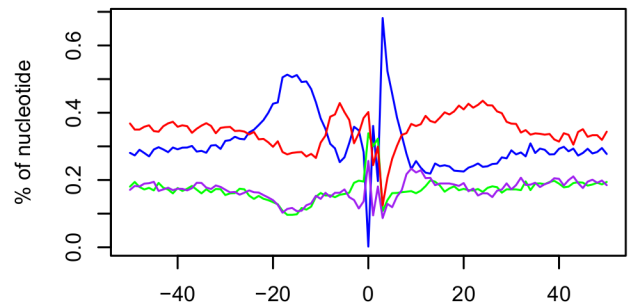

Supplement: pone.0145477.s001.pdf [file pone.0145477.s001.pdf]
