# Supplementary material for: IVT-SAPAS: Low-Input and Rapid Method for Sequencing Alternative Polyadenylation Sites
Source: PubMed Central journal article supplement (PMC4692544; doi:10.1371/journal.pone.0145477), 2015-12-28

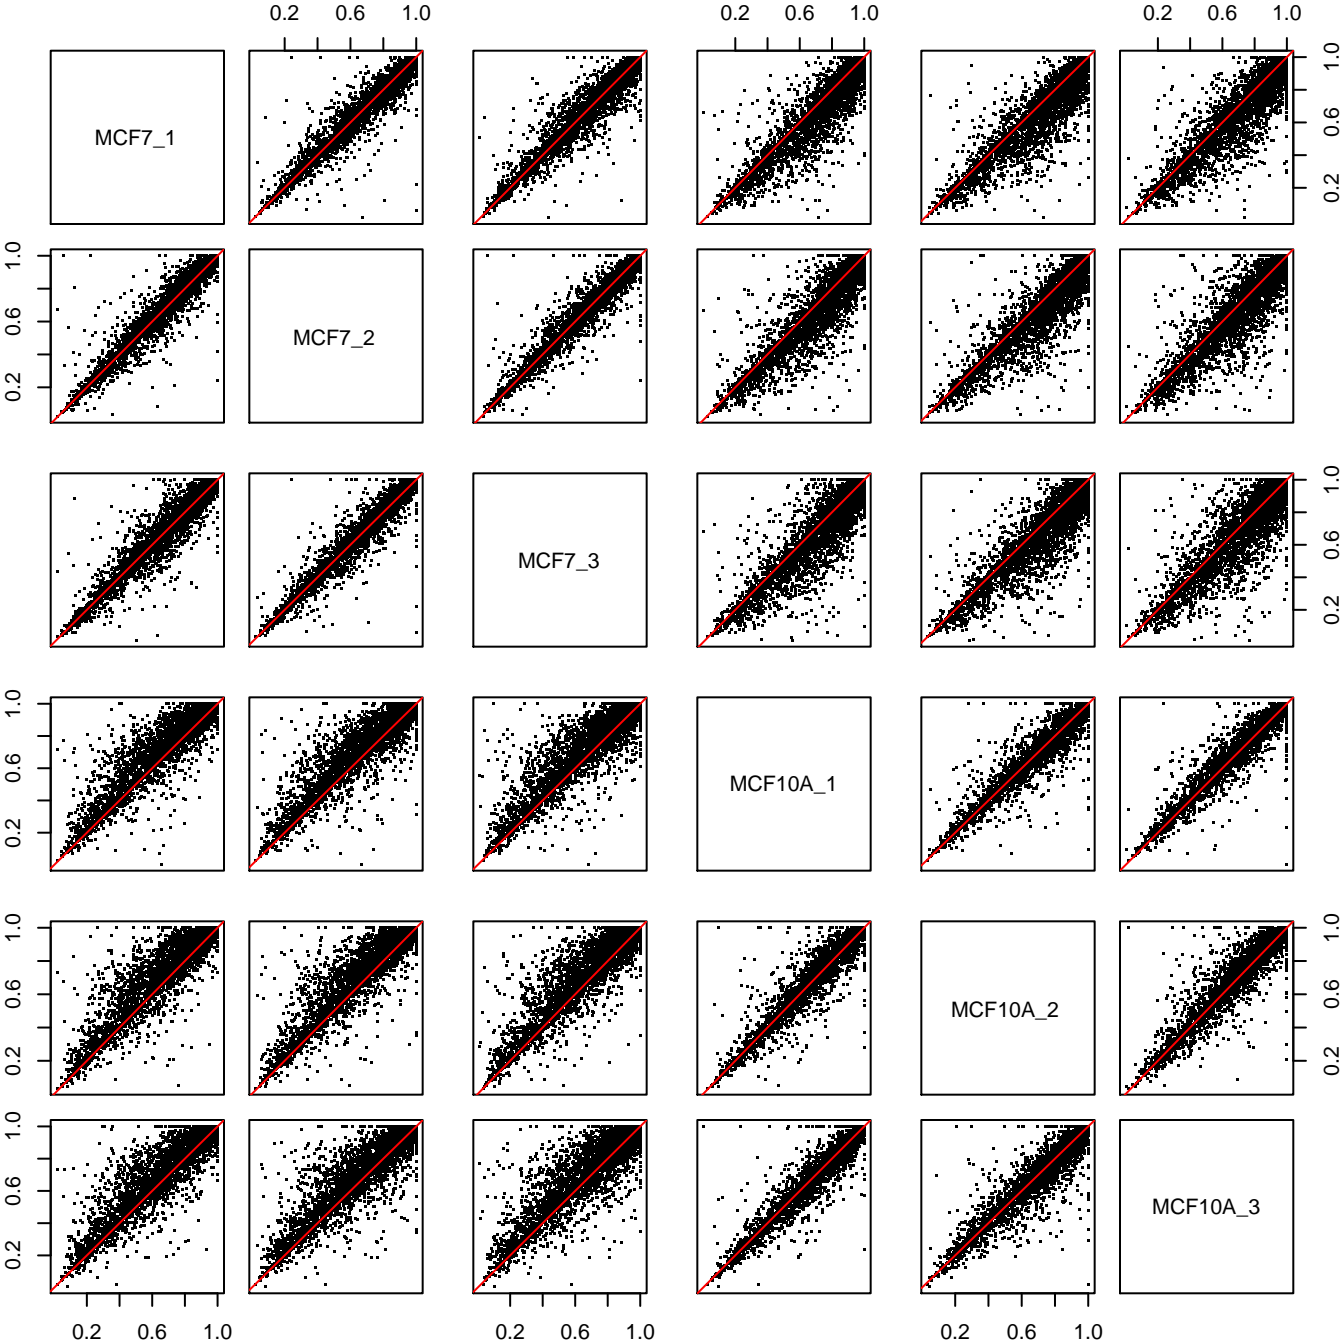

Supplement: pone.0145477.s003.pdf [file pone.0145477.s003.pdf]
